# Supplementary material for: Caffeic Acid Phenethyl Ester Causes p21Cip1 Induction, Akt Signaling Reduction, and Growth Inhibition in PC-3 Human Prostate Cancer Cells
Source: PLoS One. 2012 Feb 7;7(2):e31286. doi: 10.1371/journal.pone.0031286 (PMC3274546; doi:10.1371/journal.pone.0031286)
Supplement: Table S2 — List of differentially expressed genes at 72 h post CAPE treatment. Differentially expressed gene at 72 h post CAPE treatment was shown and value of these genes at 24 h post CAPE treatment was also shown for comparison. (XLS) [file pone.0031286.s005.xls]

## Sheet: 72h-affected genes
Supplemental Table 2. List of differentially expressed genes at 72h post CAPE treatment. Profile of gene expression at 24 h is also provided for comparison.
ProbeID	p-value	Fold change (72h)	regulation	72h control (normalized)	72h CAPE (normalized)	24h control (normalized)	24h CAPE (normalized)	Symbol	Entrez_Gene_ID	GO(Avadis)	Accession	Definition
4180292	0.0315224	1.54849	down	0.514528	-0.116334	-0.0272671	-0.0863132	ACSM3	6296	GO:0005575|GO:0005739|GO:0005759|GO:0006629|GO:0006633|GO:0008152|GO:0008217|GO:0000166|GO:0000287|GO:0005524|GO:0015645|GO:0016874|GO:0047760	NM_202000.2	Homo sapiens acyl-CoA synthetase medium-chain family member 3 (ACSM3), transcript variant 2, mRNA.
5340129	0.00549065	1.96124	up	-0.268628	0.703136	-1.15034	0.0199329	AKR1C2	1646	GO:0005737|GO:0006629|GO:0006693|GO:0007586|GO:0008202|GO:0055114|GO:0016491|GO:0032052|GO:0047026|GO:0047115	NM_001354.4	Homo sapiens aldo-keto reductase family 1, member C2 (dihydrodiol dehydrogenase 2; bile acid binding protein; 3-alpha hydroxysteroid dehydrogenase, type III) (AKR1C2), transcript variant 1, mRNA. XM_943424 XM_943425 XM_943427
3120598	0.0137411	1.81589	up	-0.293683	0.566996	-0.695147	0.433444	AKR1C4	1109	GO:0005737|GO:0005829|GO:0008209|GO:0015721|GO:0055114|GO:0004033|GO:0004033|GO:0009055|GO:0015125|GO:0016491|GO:0047042|GO:0047743	NM_001818.2	Homo sapiens aldo-keto reductase family 1, member C4 (chlordecone reductase; 3-alpha hydroxysteroid dehydrogenase, type I; dihydrodiol dehydrogenase 4) (AKR1C4), mRNA.
5810612	0.0109892	1.53348	down	0.187243	-0.429565	0.0542669	-0.0657307	ANPEP	290	GO:0005737|GO:0005793|GO:0005886|GO:0005887|GO:0001525|GO:0006508|GO:0007275|GO:0030154|GO:0044419|GO:0004177|GO:0004872|GO:0008233|GO:0008237|GO:0008270|GO:0046872	NM_001150.1	Homo sapiens alanyl (membrane) aminopeptidase (aminopeptidase N, aminopeptidase M, microsomal aminopeptidase, CD13, p150) (ANPEP), mRNA.
1050242	0.0273685	1.86202	up	-0.224853	0.672013	-0.266059	0.21653	ANXA10	11199	GO:0005634|GO:0005737|GO:0005739|GO:0005794|GO:0005509|GO:0005544	NM_007193.3	Homo sapiens annexin A10 (ANXA10), mRNA.
3400209	0.00825694	1.608	up	-0.0863886	0.598878	-0.170105	-0.0340567	ARL14	80117	GO:0005622|GO:0007264|GO:0000166|GO:0005525	NM_025047.1	Homo sapiens ADP-ribosylation factor-like 14 (ARL14), mRNA.
6560494	0.0475344	1.70435	down	0.720451	-0.0487746	-0.0326446	-0.045555	ARTN	9048	GO:0005576|GO:0005615|GO:0007165|GO:0007405|GO:0007411|GO:0007422|GO:0050930|GO:0008083	NM_057091.1	Homo sapiens artemin (ARTN), transcript variant 2, mRNA.
4780128	0.0185667	1.86384	up	-0.115446	0.782833	-0.474952	0.0921222	ATF3	467	GO:0005634|GO:0005634|GO:0005634|GO:0005634|GO:0005634|GO:0005730|GO:0006094|GO:0006355|GO:0006355|GO:0006355|GO:0006355|GO:0006355|GO:0003700|GO:0016564|GO:0043565|GO:0046983|GO:0003700|GO:0043565|GO:0046983|GO:0003700|GO:0043565|GO:0046983|GO:0003700|GO:0043565|GO:0046983|GO:0003700|GO:0003714|GO:0042802|GO:0043565|GO:0046983	NM_001040619.1	Homo sapiens activating transcription factor 3 (ATF3), transcript variant 4, mRNA.
5290161	0.0361974	1.78484	up	-0.0965789	0.739216	-0.196403	0.0240555	C17orf91	84981		NM_001001870.1	Homo sapiens chromosome 17 open reading frame 91 (C17orf91), transcript variant 2, mRNA.
1450682	0.0209602	1.56797	down	0.0336231	-0.615277	0.11297	0.0185474	C18orf56	494514		NM_001012716.1	Homo sapiens chromosome 18 open reading frame 56 (C18orf56), mRNA.
1450161	0.00018306	1.62525	up	-0.482611	0.218049	-0.0539687	0.0913003	C5orf46	389336		NM_206966.2	Homo sapiens chromosome 5 open reading frame 46 (C5orf46), mRNA.
620360	0.030754	1.51189	down	0.349726	-0.24663	0.252474	-0.299661	CAV2	858	GO:0000139|GO:0005794|GO:0016020|GO:0016021|GO:0000139|GO:0005794|GO:0005886|GO:0005887|GO:0005901|GO:0030133|GO:0048471|GO:0006906|GO:0016050|GO:0048278|GO:0005515|GO:0042803	NM_001233.3	Homo sapiens caveolin 2 (CAV2), transcript variant 1, mRNA.
4220246	0.000357605	1.75658	up	-0.757924	0.0548449	-0.120858	0.520142	CCL20	6364	GO:0005576|GO:0005615|GO:0006935|GO:0006954|GO:0006955|GO:0007165|GO:0007267|GO:0042742|GO:0005125|GO:0005515|GO:0008009	NM_004591.1	Homo sapiens chemokine (C-C motif) ligand 20 (CCL20), mRNA.
5090347	0.00744177	1.61336	up	-0.0458646	0.644207	-0.0626313	0.00198904	CD24	100133941	GO:0005886|GO:0031225|GO:0045121|GO:0001666|GO:0001775|GO:0001959|GO:0002237|GO:0002768|GO:0007204|GO:0007204|GO:0008629|GO:0016055|GO:0016337|GO:0016477|GO:0030856|GO:0031295|GO:0032597|GO:0032600|GO:0032913|GO:0042104|GO:0042325|GO:0042632|GO:0043406|GO:0043408|GO:0043627|GO:0045730|GO:0004871|GO:0005515|GO:0005515|GO:0005515|GO:0019901|GO:0030296	NM_013230.2	Homo sapiens CD24 molecule (CD24), mRNA.
2650709	0.0273884	1.72788	up	-0.639889	0.14911	0.326616	-0.0188815	CDH11	1009	GO:0005737|GO:0005886|GO:0016021|GO:0001501|GO:0001503|GO:0007156|GO:0005509|GO:0005515	NM_001797.2	Homo sapiens cadherin 11, type 2, OB-cadherin (osteoblast) (CDH11), mRNA.
4230201	0.0355497	1.85298	up	-0.468113	0.421734	-0.110524	0.699713	CDKN1A	1026	GO:0000307|GO:0005634|GO:0005654|GO:0005654|GO:0005654|GO:0005654|GO:0005654|GO:0005654|GO:0005654|GO:0005737|GO:0005829|GO:0005829|GO:0005829|GO:0000082|GO:0000086|GO:0006974|GO:0007050|GO:0008285|GO:0008629|GO:0009411|GO:0030308|GO:0030890|GO:0031668|GO:0042326|GO:0043066|GO:0043071|GO:0045736|GO:0048146|GO:0004860|GO:0004861|GO:0004861|GO:0008270|GO:0030332|GO:0046872	NM_000389.2	Homo sapiens cyclin-dependent kinase inhibitor 1A (p21, Cip1) (CDKN1A), transcript variant 1, mRNA.
6650327	0.0192	1.9036	up	0.135687	1.06441	-0.403637	-0.094089	CLGN	1047	GO:0005783|GO:0005789|GO:0016020|GO:0016021|GO:0006457|GO:0007338|GO:0005509|GO:0051082	NM_004362.1	Homo sapiens calmegin (CLGN), mRNA.
520682	0.000358407	2.58038	up	-0.9115	0.456085	0.0472158	-0.0570933	CPA4	51200	GO:0005576|GO:0006508|GO:0016573|GO:0004181|GO:0008233|GO:0008237|GO:0008270|GO:0046872	NM_016352.2	Homo sapiens carboxypeptidase A4 (CPA4), mRNA.
5390687	0.0270387	1.52277	up	0.116917	0.723615	-0.172701	-0.0582765	CPE	1363	GO:0005576|GO:0005886|GO:0006464|GO:0006508|GO:0007218|GO:0008152|GO:0030070|GO:0004181|GO:0008233|GO:0008237|GO:0008270|GO:0046872	NM_001873.1	Homo sapiens carboxypeptidase E (CPE), mRNA.
4830382	0.0222187	1.7666	up	-0.250186	0.57079	-0.161519	0.061228	CPEB2	132864	GO:0005737|GO:0006417|GO:0000166|GO:0003723	NM_182646.1	Homo sapiens cytoplasmic polyadenylation element binding protein 2 (CPEB2), transcript variant A, mRNA.
6200577	0.00984016	1.56289	up	-0.0500415	0.594177	-0.255485	-0.0129948	CREB5	9586	GO:0005622|GO:0005634|GO:0006350|GO:0006366|GO:0045893|GO:0003700|GO:0008270|GO:0043565|GO:0046872|GO:0046983	NM_182898.2	Homo sapiens cAMP responsive element binding protein 5 (CREB5), transcript variant 1, mRNA.
2750196	0.0160974	1.68197	up	-0.114046	0.636105	-0.503938	0.0578151	CSF2	1437	GO:0005576|GO:0005615|GO:0006955|GO:0008284|GO:0042523|GO:0043011|GO:0045740|GO:0045885|GO:0005125|GO:0005129	NM_000758.2	Homo sapiens colony stimulating factor 2 (granulocyte-macrophage) (CSF2), mRNA.
1430477	0.00483923	1.63947	down	0.166885	-0.546342	0.0672226	-0.133953	CTSL2	1515	GO:0005764|GO:0006508|GO:0004197|GO:0005515|GO:0008233	NM_001333.2	Homo sapiens cathepsin L2 (CTSL2), mRNA.
4670390	0.0328157	3.35623	up	-1.37166	0.375186	-0.506461	0.591974	CXCL2	2920	GO:0005576|GO:0005615|GO:0005625|GO:0006935|GO:0006954|GO:0006955|GO:0008009	NM_002089.3	Homo sapiens chemokine (C-X-C motif) ligand 2 (CXCL2), mRNA.
380010	0.00568788	3.71665	up	-1.44084	0.453164	-0.413947	0.543469	CXCL5	6374	GO:0005576|GO:0005615|GO:0006935|GO:0006955|GO:0007165|GO:0007267|GO:0008284|GO:0008009	NM_002994.3	Homo sapiens chemokine (C-X-C motif) ligand 5 (CXCL5), mRNA.
540377	0.0035152	3.34614	up	-1.1726	0.569899	-0.399009	0.356174	CXCL5	6374	GO:0005576|GO:0005615|GO:0006935|GO:0006955|GO:0007165|GO:0007267|GO:0008284|GO:0008009	NM_002994.3	Homo sapiens chemokine (C-X-C motif) ligand 5 (CXCL5), mRNA.
6620487	0.00691924	1.73125	up	-0.773018	0.0187922	-0.00224431	0.46629	CXCL6	6372	GO:0005576|GO:0005615|GO:0006935|GO:0006954|GO:0006955|GO:0007165|GO:0007267|GO:0008009|GO:0008201	NM_002993.2	Homo sapiens chemokine (C-X-C motif) ligand 6 (granulocyte chemotactic protein 2) (CXCL6), mRNA.
60192	0.0172697	1.82577	up	-0.240594	0.627913	-0.161758	0.185339	CXCL6	6372	GO:0005576|GO:0005615|GO:0006935|GO:0006954|GO:0006955|GO:0007165|GO:0007267|GO:0008009|GO:0008201	NM_002993.2	Homo sapiens chemokine (C-X-C motif) ligand 6 (granulocyte chemotactic protein 2) (CXCL6), mRNA.
2120053	0.023022	2.73982	down	0.922835	-0.531248	1.02924	-1.10118	CYP1B1	1545	GO:0005783|GO:0005789|GO:0005792|GO:0016020|GO:0007601|GO:0055114|GO:0004497|GO:0005506|GO:0009055|GO:0020037|GO:0004497|GO:0005506|GO:0005515|GO:0009055|GO:0019825|GO:0020037|GO:0046872|GO:0050381	NM_000104.2	Homo sapiens cytochrome P450, family 1, subfamily B, polypeptide 1 (CYP1B1), mRNA.
5050431	0.0214176	1.7879	up	0.00248814	0.84075	-0.0545786	-0.0205798	DCLK1	9201	GO:0005887|GO:0001764|GO:0006468|GO:0007242|GO:0007275|GO:0007417|GO:0016197|GO:0021952|GO:0030154|GO:0030900|GO:0048675|GO:0048813|GO:0000166|GO:0004674|GO:0005057|GO:0005515|GO:0005524|GO:0016740	NM_004734.2	Homo sapiens doublecortin-like kinase 1 (DCLK1), mRNA.
830619	0.00242347	1.86395	up	-0.268702	0.629658	-0.32567	0.188102	DDIT3	1649	GO:0005634|GO:0006350|GO:0006355|GO:0006974|GO:0006983|GO:0007049|GO:0007050|GO:0030968|GO:0042789|GO:0042981|GO:0045454|GO:0003700|GO:0003714|GO:0043565|GO:0046983	NM_004083.4	Homo sapiens DNA-damage-inducible transcript 3 (DDIT3), mRNA.
5270671	0.0364696	1.66431	up	-0.0833149	0.65161	-0.0473927	-0.0258067	DEFB103A	55894	GO:0005576|GO:0006965|GO:0042742	NM_018661.3	Homo sapiens defensin, beta 103A (DEFB103A), mRNA.
6770041	0.0391681	3.31635	up	-0.339386	1.39021	-0.07933	0.0753411	DEFB103B	414325		NM_001081551.2	Homo sapiens defensin, beta 103B (DEFB103B), mRNA.
6900707	0.0426405	3.30791	up	-0.436095	1.28983	-0.121913	0.142424	DEFB103B	414325		NM_001081551.2	Homo sapiens defensin, beta 103B (DEFB103B), mRNA.
2120091	0.000907174	4.27352	up	-0.937419	1.158	0.00332737	-0.084343	DEFB4	1673	GO:0005576|GO:0006935|GO:0006955|GO:0007186|GO:0042742	NM_004942.2	Homo sapiens defensin, beta 4 (DEFB4), mRNA.
630315	0.00186278	2.66811	up	-0.00598733	1.40983	-0.3677	-0.00468286	DHRS9	10170	GO:0005783|GO:0005789|GO:0005792|GO:0005792|GO:0016020|GO:0030176|GO:0030176|GO:0005792|GO:0030176|GO:0008209|GO:0030855|GO:0042448|GO:0042572|GO:0042904|GO:0042904|GO:0055114|GO:0008209|GO:0042904|GO:0055114|GO:0004022|GO:0004022|GO:0004745|GO:0004745|GO:0005488|GO:0016491|GO:0016854|GO:0047035|GO:0047035|GO:0004022|GO:0004745|GO:0005488|GO:0016491|GO:0047035	NM_005771.3	Homo sapiens dehydrogenase/reductase (SDR family) member 9 (DHRS9), transcript variant 1, mRNA.
7160468	0.0257428	1.76989	up	-0.0419208	0.781742	-0.0827659	-0.0315517	DHRS9	10170	GO:0005783|GO:0005789|GO:0005792|GO:0005792|GO:0016020|GO:0030176|GO:0030176|GO:0005792|GO:0030176|GO:0008209|GO:0030855|GO:0042448|GO:0042572|GO:0042904|GO:0042904|GO:0055114|GO:0008209|GO:0042904|GO:0055114|GO:0004022|GO:0004022|GO:0004745|GO:0004745|GO:0005488|GO:0016491|GO:0016854|GO:0047035|GO:0047035|GO:0004022|GO:0004745|GO:0005488|GO:0016491|GO:0047035	NM_005771.3	Homo sapiens dehydrogenase/reductase (SDR family) member 9 (DHRS9), transcript variant 1, mRNA.
4880609	0.032133	1.8185	up	0.272405	1.13515	-0.244435	-0.129677	DKK1	22943	GO:0005576|GO:0005886|GO:0007275|GO:0030178|GO:0030326|GO:0004871|GO:0005515|GO:0008083|GO:0050750	NM_012242.2	Homo sapiens dickkopf homolog 1 (Xenopus laevis) (DKK1), mRNA.
5570102	0.0131338	1.69826	up	-0.700816	0.063241	0.111115	0.038902	DKK1	22943	GO:0005576|GO:0005886|GO:0007275|GO:0030178|GO:0030326|GO:0004871|GO:0005515|GO:0008083|GO:0050750	NM_012242.2	Homo sapiens dickkopf homolog 1 (Xenopus laevis) (DKK1), mRNA.
6220209	0.02198	2.62092	up	-0.415731	0.974343	-0.059123	-0.176169	DMBT1	1755	GO:0005576|GO:0005737|GO:0016020|GO:0030670|GO:0005576|GO:0005578|GO:0005622|GO:0016020|GO:0016020|GO:0016020|GO:0005576|GO:0016020|GO:0030855|GO:0030855|GO:0043152|GO:0045087|GO:0045786|GO:0001824|GO:0001833|GO:0030858|GO:0005044|GO:0005044|GO:0008329|GO:0048306|GO:0005044|GO:0005044|GO:0005044|GO:0005044	NM_017579.1	Homo sapiens deleted in malignant brain tumors 1 (DMBT1), transcript variant 3, mRNA.
4570669	0.0176485	1.69421	up	-0.37171	0.388905	0.0637385	-0.0229899	DNER	92737	GO:0005769|GO:0005886|GO:0016021|GO:0030425|GO:0043025|GO:0001764|GO:0006897|GO:0007220|GO:0007416|GO:0007417|GO:0010001|GO:0048741|GO:0004888|GO:0005112|GO:0005509|GO:0030276	NM_139072.3	Homo sapiens delta/notch-like EGF repeat containing (DNER), mRNA.
6860377	0.0292823	1.83384	up	0.0484168	0.923284	-0.723499	0.0368029	DUSP1	1843	GO:0006470|GO:0006979|GO:0007049|GO:0004726|GO:0005515|GO:0016787|GO:0017017	NM_004417.2	Homo sapiens dual specificity phosphatase 1 (DUSP1), mRNA.
3780707	0.0226613	1.86784	up	-0.265843	0.63553	-0.217514	0.244523	DUSP10	11221	GO:0005634|GO:0005737|GO:0006470|GO:0006950|GO:0007254|GO:0006470|GO:0004725|GO:0016787|GO:0017017|GO:0004725|GO:0016787|GO:0016791|GO:0017017	NM_144729.1	Homo sapiens dual specificity phosphatase 10 (DUSP10), transcript variant 3, mRNA.
5390161	0.039432	1.58206	up	-0.151462	0.510339	-0.795713	0.259586	DUSP5	1847	GO:0005634|GO:0006470|GO:0004725|GO:0016787|GO:0017017	NM_004419.3	Homo sapiens dual specificity phosphatase 5 (DUSP5), mRNA.
6280242	0.0120342	1.74619	down	0.215658	-0.58855	0.120098	-0.08649	DUT	1854	GO:0005739|GO:0005634|GO:0005739|GO:0005739|GO:0005829|GO:0046080|GO:0006139|GO:0006260|GO:0009117|GO:0046080|GO:0004170|GO:0016787|GO:0000287|GO:0004170|GO:0004170|GO:0016787	NM_001025248.1	Homo sapiens deoxyuridine triphosphatase (DUT), nuclear gene encoding mitochondrial protein, transcript variant 1, mRNA.
6330494	0.026512	1.79126	down	0.115051	-0.725923	0.142088	-0.162182	DUT	1854	GO:0005739|GO:0005634|GO:0005739|GO:0005739|GO:0005829|GO:0046080|GO:0006139|GO:0006260|GO:0009117|GO:0046080|GO:0004170|GO:0016787|GO:0000287|GO:0004170|GO:0004170|GO:0016787	NM_001025249.1	Homo sapiens deoxyuridine triphosphatase (DUT), nuclear gene encoding mitochondrial protein, transcript variant 3, mRNA.
7150563	0.0252452	1.84941	up	-0.509922	0.37714	-0.158727	0.0798066	ENC1	8507	GO:0005634|GO:0005737|GO:0005856|GO:0016363|GO:0006511|GO:0007275|GO:0007399|GO:0003779|GO:0005515	NM_003633.1	Homo sapiens ectodermal-neural cortex (with BTB-like domain) (ENC1), mRNA.
3420605	0.0131623	2.03516	up	-1.01984	0.00530306	0.0625261	0.41463	ESM1	11082	GO:0005576|GO:0005576|GO:0001558|GO:0008150|GO:0001558|GO:0005515|GO:0005520|GO:0008083|GO:0005520	NM_007036.3	Homo sapiens endothelial cell-specific molecule 1 (ESM1), mRNA.
580739	0.00970868	1.53468	down	0.273437	-0.3445	0.146283	-0.143176	FBLN1	2192	GO:0005576|GO:0005576|GO:0005737|GO:0005576|GO:0005737|GO:0005576|GO:0005576|GO:0005576|GO:0005576|GO:0005578|GO:0005615|GO:0005625|GO:0005737|GO:0044419|GO:0005509|GO:0005509|GO:0005509|GO:0005201|GO:0005509|GO:0005515	NM_001996.2	Homo sapiens fibulin 1 (FBLN1), transcript variant C, mRNA.
130609	0.03251	1.70872	up	0.435653	1.20857	-0.591851	-0.320416	FCGBP	8857	GO:0005576|GO:0005737|GO:0005886|GO:0007155|GO:0007339	NM_003890.1	Homo sapiens Fc fragment of IgG binding protein (FCGBP), mRNA.
4610672	0.0320873	1.74423	down	0.503945	-0.298649	0.25599	-0.273257	FLJ14213	79899		NM_024841.3	Homo sapiens protor-2 (FLJ14213), mRNA.
270358	0.0399488	1.53205	up	-0.0263549	0.589107	-0.210732	0.00401497	FRAS1	80144	GO:0005604|GO:0005886|GO:0016021|GO:0002009|GO:0007154|GO:0005509|GO:0005515	NM_025074.4	Homo sapiens Fraser syndrome 1 (FRAS1), mRNA.
670255	0.013441	1.67505	up	-0.203691	0.540512	-0.281713	0.0682236	GADD45A	1647	GO:0005634|GO:0006469|GO:0007098|GO:0051726|GO:0000079|GO:0006281|GO:0006915|GO:0007049|GO:0007050|GO:0005515	NM_001924.2	Homo sapiens growth arrest and DNA-damage-inducible, alpha (GADD45A), mRNA.
4880673	0.0130838	1.50829	up	-0.146138	0.446774	-0.391918	-0.0274343	GADD45A	1647	GO:0005634|GO:0006469|GO:0007098|GO:0051726|GO:0000079|GO:0006281|GO:0006915|GO:0007049|GO:0007050|GO:0005515	NM_001924.2	Homo sapiens growth arrest and DNA-damage-inducible, alpha (GADD45A), mRNA.
1510364	0.0250773	1.53891	up	-0.101882	0.520027	-0.0318499	0.0498929	GBP5	115362	GO:0005886|GO:0006955|GO:0000166|GO:0003924|GO:0005525	NM_052942.2	Homo sapiens guanylate binding protein 5 (GBP5), mRNA.
5090671	0.00704268	3.79898	up	0.596553	2.52217	-1.32596	-0.141348	GDF15	9518	GO:0005576|GO:0005615|GO:0005794|GO:0007165|GO:0007179|GO:0007267|GO:0005125|GO:0008083	NM_004864.1	Homo sapiens growth differentiation factor 15 (GDF15), mRNA.
5130563	0.0137491	1.90716	up	-0.423242	0.508187	-0.346208	0.270123	GFPT2	9945	GO:0005737|GO:0006002|GO:0006112|GO:0006541|GO:0008152|GO:0016051|GO:0004360|GO:0005529|GO:0016740	NM_005110.1	Homo sapiens glutamine-fructose-6-phosphate transaminase 2 (GFPT2), mRNA.
4150369	0.0351698	1.66945	up	-0.408252	0.331123	-0.19885	0.452565	GK	2710	GO:0005737|GO:0005739|GO:0005741|GO:0005829|GO:0016020|GO:0005975|GO:0006072|GO:0005975|GO:0006071|GO:0004370|GO:0016740|GO:0000166|GO:0004370|GO:0004370|GO:0004370|GO:0005524|GO:0016740	NM_203391.1	Homo sapiens glycerol kinase (GK), transcript variant 1, mRNA.
6220746	0.00247543	1.79482	up	-0.624826	0.219012	-0.104761	0.449911	GLIPR1	11010	GO:0005576|GO:0016020|GO:0016021	NM_006851.2	Homo sapiens GLI pathogenesis-related 1 (GLIPR1), mRNA.
6590594	0.0441756	1.85496	up	-0.374221	0.517164	-0.13879	0.260829	HIST1H2AC	8334	GO:0000786|GO:0005634|GO:0005694|GO:0006334|GO:0003677	NM_003512.3	Homo sapiens histone cluster 1, H2ac (HIST1H2AC), mRNA.
450753	0.00131636	1.79702	up	-0.245742	0.599863	-0.266434	0.137669	HIST1H2BC	8347	GO:0000786|GO:0005634|GO:0005694|GO:0000786|GO:0000786|GO:0005634|GO:0005694|GO:0006334|GO:0006334|GO:0006334|GO:0042742|GO:0003677|GO:0003677|GO:0003677|GO:0005515	NM_003526.2	Homo sapiens histone cluster 1, H2bc (HIST1H2BC), mRNA.
290730	0.0192517	2.16461	up	-0.198507	0.915597	-0.502204	0.145404	HIST1H2BD	3017	GO:0000786|GO:0005634|GO:0005694|GO:0006334|GO:0003677	NM_138720.1	Homo sapiens histone cluster 1, H2bd (HIST1H2BD), transcript variant 2, mRNA.
1450484	0.012566	1.51384	up	-0.0850539	0.513155	-0.216437	0.0807741	HIST1H2BE	8344		NM_003523.2	Homo sapiens histone cluster 1, H2be (HIST1H2BE), mRNA.
430546	0.0108975	1.61202	up	-0.137237	0.551633	-0.118874	0.0407025	HIST1H2BG	8339		NM_003518.3	Homo sapiens histone cluster 1, H2bg (HIST1H2BG), mRNA.
5050402	0.0096696	1.64012	up	-0.335163	0.378639	-0.147293	0.206684	HIST1H2BK	85236	GO:0000786|GO:0005634|GO:0005694|GO:0006334|GO:0042742|GO:0003677	NM_080593.1	Homo sapiens histone cluster 1, H2bk (HIST1H2BK), mRNA.
2970019	0.0116439	3.66631	up	-0.585004	1.28933	-0.31011	0.390938	HIST1H4H	8365		NM_003543.3	Homo sapiens histone cluster 1, H4h (HIST1H4H), mRNA.
1820592	0.0409641	5.27444	up	-0.219492	2.17953	-0.449062	0.136999	HIST2H2AA3	8337	GO:0000786|GO:0005634|GO:0005694|GO:0006334|GO:0003677	NM_003516.2	Homo sapiens histone cluster 2, H2aa3 (HIST2H2AA3), mRNA.
6100022	0.0477609	1.9053	up	0.0431824	0.973202	-0.205216	-0.248405	HIST2H2AC	8338	GO:0000786|GO:0005634|GO:0005694|GO:0006334|GO:0003677	NM_003517.2	Homo sapiens histone cluster 2, H2ac (HIST2H2AC), mRNA.
4890279	0.0201074	1.56512	up	-0.307546	0.338725	-0.0346201	0.0279336	HIST2H4A	8370		NM_003548.2	Homo sapiens histone cluster 2, H4a (HIST2H4A), mRNA.
4250364	0.0290805	1.94152	up	-0.0251428	0.932047	-0.279512	0.0111496	HPGD	3248	GO:0005634|GO:0005737|GO:0005829|GO:0006629|GO:0006631|GO:0006693|GO:0007179|GO:0007565|GO:0007567|GO:0019372|GO:0045786|GO:0055114|GO:0004957|GO:0005488|GO:0016404|GO:0016404|GO:0016404|GO:0016491|GO:0042803|GO:0051287|GO:0051287	NM_000860.3	Homo sapiens hydroxyprostaglandin dehydrogenase 15-(NAD) (HPGD), mRNA.
1660296	0.0328143	1.95663	up	-0.312308	0.656065	-0.145319	0.21266	ID2	3398	GO:0005634|GO:0005737|GO:0000122|GO:0007275|GO:0007507|GO:0043353|GO:0045449|GO:0045651|GO:0005515|GO:0030528	NM_002166.4	Homo sapiens inhibitor of DNA binding 2, dominant negative helix-loop-helix protein (ID2), mRNA.
7570324	0.0368443	1.98424	up	-0.738932	0.249653	0.0718954	-0.0308555	ID3	3399	GO:0005634|GO:0000122|GO:0007275|GO:0007507|GO:0030855|GO:0045449|GO:0003714|GO:0008134|GO:0019904|GO:0030528	NM_002167.2	Homo sapiens inhibitor of DNA binding 3, dominant negative helix-loop-helix protein (ID3), mRNA.
3870594	0.00246481	1.50186	up	-0.25192	0.334828	-0.164357	0.187903	IFI16	3428	GO:0005634|GO:0005634|GO:0005634|GO:0005654|GO:0005730|GO:0005730|GO:0005730|GO:0005737|GO:0006350|GO:0006355|GO:0008283|GO:0009615|GO:0030099|GO:0030224|GO:0042771|GO:0003677|GO:0003690|GO:0005515|GO:0016564	NM_005531.1	Homo sapiens interferon, gamma-inducible protein 16 (IFI16), mRNA.
6510026	0.0104136	1.9348	up	-0.0327899	0.919392	-0.338747	-0.0632168	IL23A	51561	GO:0005576|GO:0005615|GO:0005737|GO:0006954|GO:0009615|GO:0045087|GO:0048771|GO:0005125	NM_016584.2	Homo sapiens interleukin 23, alpha subunit p19 (IL23A), mRNA.
4290201	0.0418302	1.78539	up	-0.403688	0.432548	0.247415	-0.0996731	IL24	11009	GO:0005576|GO:0005576|GO:0005615|GO:0005634|GO:0005737|GO:0006955|GO:0006915|GO:0006955|GO:0005125|GO:0005125	NM_006850.2	Homo sapiens interleukin 24 (IL24), transcript variant 1, mRNA.
4040576	0.0142005	2.85129	up	-1.23092	0.280698	-0.368441	0.197227	IL6	3569	GO:0005576|GO:0005576|GO:0005615|GO:0001781|GO:0006953|GO:0006954|GO:0006959|GO:0007166|GO:0007267|GO:0008284|GO:0008285|GO:0033138|GO:0042832|GO:0043066|GO:0043410|GO:0045079|GO:0045630|GO:0045727|GO:0045944|GO:0046888|GO:0050731|GO:0051384|GO:0005125|GO:0005138|GO:0005515	NM_000600.1	Homo sapiens interleukin 6 (interferon, beta 2) (IL6), mRNA.
360192	0.00810796	1.83862	down	0.306366	-0.572254	-0.137236	0.380117	INSIG1	3638	GO:0005783|GO:0005789|GO:0016020|GO:0016021|GO:0006629|GO:0008152|GO:0008202|GO:0008203|GO:0008283|GO:0006991|GO:0005515|GO:0005515	NM_198336.1	Homo sapiens insulin induced gene 1 (INSIG1), transcript variant 2, mRNA.
4570075	0.0135159	1.69908	up	-0.074314	0.690443	-0.104802	-0.00676934	KIAA1641	57730		XM_944061.1	PREDICTED: Homo sapiens KIAA1641, transcript variant 7 (KIAA1641), mRNA.
2810059	0.0159989	1.77564	up	-0.110463	0.717877	-0.675241	0.100374	KLF4	9314	GO:0005622|GO:0005634|GO:0005622|GO:0006350|GO:0007500|GO:0008285|GO:0045892|GO:0045892|GO:0003700|GO:0008270|GO:0016563|GO:0016564|GO:0046872|GO:0003676|GO:0008270|GO:0016564	NM_004235.3	Homo sapiens Kruppel-like factor 4 (gut) (KLF4), mRNA.
3710168	0.0310033	3.85061	up	-0.667717	1.27737	-0.348495	0.486282	KRT34	3885	GO:0005882|GO:0005882|GO:0008544|GO:0005198|GO:0005515|GO:0005198	NM_021013.3	Homo sapiens keratin 34 (KRT34), mRNA.
3830681	0.00648976	3.21423	up	-0.947268	0.737205	-0.196874	0.247123	KRT6A	3853	GO:0005575|GO:0045095|GO:0007398|GO:0008284|GO:0030154|GO:0005200|GO:0005515	NM_005554.3	Homo sapiens keratin 6A (KRT6A), mRNA.
2350196	0.0416687	2.36029	up	-0.326195	0.912766	-0.253331	0.177171	KRT6B	3854	GO:0045095|GO:0007398|GO:0005200	NM_005555.3	Homo sapiens keratin 6B (KRT6B), mRNA.
5820626	0.0177221	1.73744	up	-0.285491	0.51147	-0.215736	0.121062	KRT6C	286887	GO:0045095|GO:0007010|GO:0005198	NM_173086.3	Homo sapiens keratin 6C (KRT6C), mRNA.
6370309	0.00956022	2.18479	up	-0.81463	0.312867	-0.277964	0.166868	KRT75	9119	GO:0045095|GO:0005198	NM_004693.2	Homo sapiens keratin 75 (KRT75), mRNA.
3460685	0.00939448	1.72406	up	-0.290996	0.494814	-0.289001	0.202674	KYNU	8942	GO:0005737|GO:0005625|GO:0005737|GO:0005739|GO:0005829|GO:0005829|GO:0006569|GO:0009435|GO:0006569|GO:0008152|GO:0009435|GO:0019805|GO:0034341|GO:0034516|GO:0043420|GO:0016787|GO:0030170|GO:0030429|GO:0016787|GO:0030170|GO:0030429|GO:0030429|GO:0030429|GO:0030429|GO:0042803	NM_003937.2	Homo sapiens kynureninase (L-kynurenine hydrolase) (KYNU), transcript variant 1, mRNA.
4880477	0.0183929	1.6608	up	-0.617776	0.114102	0.251373	-0.102755	LOC643031	643031		XM_926402.1	PREDICTED: Homo sapiens similar to NADH dehydrogenase subunit 5 (LOC643031), mRNA.
4040113	0.0169273	2.45567	up	0.121907	1.41802	-0.375202	-0.0568558	LOC643272	643272		XM_926633.1	PREDICTED: Homo sapiens hypothetical protein LOC643272 (LOC643272), mRNA.
1690400	0.0493144	1.54786	up	0.0589838	0.689259	-0.26482	-0.158066	LOC644151	644151		XM_927359.1	PREDICTED: Homo sapiens similar to calpain 8 (LOC644151), mRNA.
3370553	0.0444312	1.59264	up	-0.0290543	0.64237	-0.245167	0.0412896	LOC650428	650428		XM_939516.2	PREDICTED: Homo sapiens similar to keratin, hair, basic, 6 (LOC650428), mRNA.
2320689	0.0445478	2.22028	up	-0.107143	1.0436	-0.0848551	0.0905377	LOC653610	653610		XM_928387.1	PREDICTED: Homo sapiens similar to Histone H2A.o (H2A/o) (H2A.2) (H2a-615) (LOC653610), mRNA.
3440424	0.00518611	1.71779	down	0.0389083	-0.741643	0.0823555	0.0410493	LOC653820	653820		XM_930579.2	PREDICTED: Homo sapiens similar to family with sequence similarity 72, member A, transcript variant 1 (LOC653820), mRNA.
3940673	0.0180762	2.80128	up	-0.796451	0.689636	-0.38587	0.593314	LOC728285	728285		XM_001127070.1	PREDICTED: Homo sapiens similar to keratin associated protein 2-4 (LOC728285), mRNA.
580709	0.00271079	5.77377	up	-0.778933	1.75058	-0.00782665	0.0703909	LOC728454	728454		XM_001128061.1	PREDICTED: Homo sapiens similar to Beta-defensin 2 precursor (BD-2) (hBD-2) (Defensin, beta 2) (Skin-antimicrobial peptide 1) (SAP1) (LOC728454), mRNA.
1440452	0.0178536	2.34179	up	-0.491897	0.735715	-0.203327	0.106676	LOC88523	88523		NM_033111.2	Homo sapiens CG016 (LOC88523), mRNA.
70167	0.022363	3.04913	up	-0.34078	1.26762	-0.583195	0.152334	LY96	23643	GO:0005576|GO:0005886|GO:0005886|GO:0005886|GO:0005886|GO:0005886|GO:0006954|GO:0006955|GO:0006968|GO:0007166|GO:0007249|GO:0005515|GO:0015026	NM_015364.2	Homo sapiens lymphocyte antigen 96 (LY96), mRNA.
6620017	0.0187178	1.60974	up	-0.314329	0.372502	-0.237488	0.302679	MKX	283078	GO:0005634|GO:0005730|GO:0006355|GO:0007275|GO:0007517|GO:0003700|GO:0043565	NM_173576.1	Homo sapiens mohawk homeobox (MKX), mRNA.
150180	0.0330519	1.62726	up	0.00509643	0.707537	-0.0243634	-0.0398722	MMP10	4319	GO:0005576|GO:0005578|GO:0005615|GO:0006508|GO:0008152|GO:0030574|GO:0004222|GO:0005509|GO:0008233|GO:0008270	NM_002425.1	Homo sapiens matrix metallopeptidase 10 (stromelysin 2) (MMP10), mRNA.
2490603	0.0171905	1.5248	up	-0.509361	0.0992546	0.0778783	0.00466474	MYPN	84665	GO:0005634|GO:0005737|GO:0003779	NM_032578.2	Homo sapiens myopalladin (MYPN), mRNA.
2230379	0.0448804	1.69758	up	-0.386687	0.37679	-0.191197	0.390956	NAMPT	10135	GO:0005737|GO:0005829|GO:0007165|GO:0007267|GO:0008284|GO:0009435|GO:0005125|GO:0016757|GO:0047280|GO:0047280	NM_005746.2	Homo sapiens nicotinamide phosphoribosyltransferase (NAMPT), mRNA.
6480014	0.00213772	2.14384	up	-0.318229	0.781969	-0.187876	0.116468	NOPE	57722	GO:0005634|GO:0005730|GO:0005886|GO:0016021	NM_020962.1	Homo sapiens neighbor of Punc E11 (NOPE), mRNA.
4290037	0.00569616	2.10857	up	-0.841272	0.234992	-0.352826	0.239105	NOV	4856	GO:0005576|GO:0001558|GO:0005520|GO:0008083	NM_002514.2	Homo sapiens nephroblastoma overexpressed gene (NOV), mRNA.
5670059	0.00351149	1.53637	down	0.171766	-0.447756	0.0100211	-0.033538	NRM	11270	GO:0005634|GO:0005635|GO:0005637|GO:0016020|GO:0016021|GO:0008150|GO:0003674	NM_007243.1	Homo sapiens nurim (nuclear envelope membrane protein) (NRM), mRNA.
6350053	0.00800814	1.51217	down	0.0910317	-0.505588	0.0871147	-0.0725657	NUSAP1	51203	GO:0005634|GO:0005737|GO:0005874|GO:0000281|GO:0007049|GO:0007076|GO:0040001|GO:0045840|GO:0051301|GO:0003677	NM_018454.5	Homo sapiens nucleolar and spindle associated protein 1 (NUSAP1), transcript variant 2, mRNA.
4260253	0.0353077	1.52893	up	-0.445773	0.16675	-0.0218433	-0.00801563	OBFC2A	64859	GO:0005634|GO:0003676|GO:0003697|GO:0003723	NM_001031716.1	Homo sapiens oligonucleotide/oligosaccharide-binding fold containing 2A (OBFC2A), mRNA.
1260689	0.020162	1.62158	up	0.109855	0.807252	-0.171672	-0.0167141	OR7E91P	79315	GO:0005886|GO:0016021|GO:0007165|GO:0007186|GO:0004872|GO:0004984	NR_002185.2	Homo sapiens olfactory receptor, family 7, subfamily E, member 91 pseudogene (OR7E91P), non-coding RNA.
3890601	0.00697593	1.96767	down	0.812282	-0.16421	0.0492318	-0.312543	PADI3	51702	GO:0005737|GO:0006464|GO:0018101|GO:0004668|GO:0005509|GO:0016787	NM_016233.2	Homo sapiens peptidyl arginine deiminase, type III (PADI3), mRNA.
2650035	0.00390656	5.76658	down	1.82011	-0.707605	0.165421	-1.20096	PADI4	23569	GO:0005634|GO:0005737|GO:0006350|GO:0006355|GO:0006464|GO:0016568|GO:0018101|GO:0004668|GO:0005509|GO:0016787	NM_012387.1	Homo sapiens peptidyl arginine deiminase, type IV (PADI4), mRNA.
4540682	0.0409994	1.51048	down	0.779403	0.184392	-0.156126	-0.234109	PALM	5064	GO:0005737|GO:0005886|GO:0005887|GO:0016023|GO:0006928|GO:0007010|GO:0007194|GO:0008104|GO:0008360|GO:0030818|GO:0031750	NM_002579.2	Homo sapiens paralemmin (PALM), transcript variant 1, mRNA.
3450243	0.0394851	2.26019	up	0.62712	1.80356	-1.65652	-1.15411	PC-3	692094		NM_001044264.1	Homo sapiens secreted microprotein PC-3 (PC-3), mRNA.
110347	0.0126419	1.69827	down	0.581034	-0.183028	0.01907	-0.0407098	PDK3	5165	GO:0005739|GO:0005759|GO:0005975|GO:0006006|GO:0007165|GO:0016310|GO:0018106|GO:0000155|GO:0004740|GO:0005524	NM_005391.2	Homo sapiens pyruvate dehydrogenase kinase, isozyme 3 (PDK3), mRNA.
1050168	0.0287254	4.26644	up	-0.545204	1.54783	-0.341134	0.30388	PI3	5266	GO:0005576|GO:0005578|GO:0007620|GO:0004867|GO:0005515	NM_002638.2	Homo sapiens peptidase inhibitor 3, skin-derived (SKALP) (PI3), mRNA.
770468	0.0372253	1.56903	up	-0.197513	0.452362	-0.0176044	0.123214	PJCG6	645642		NM_001040066.1	Homo sapiens similar to olfactory receptor 873 (PJCG6), mRNA.
1340600	0.010384	1.50388	up	-0.159922	0.428771	-0.123355	0.0387198	PPP1R15A	23645	GO:0005783|GO:0006417|GO:0006915|GO:0006974|GO:0007050|GO:0005515	NM_014330.2	Homo sapiens protein phosphatase 1, regulatory (inhibitor) subunit 15A (PPP1R15A), mRNA.
1070762	0.0202372	1.54012	down	0.0397374	-0.583304	0.0743351	-0.0133282	PSRC1	84722	GO:0005737|GO:0005819|GO:0030496|GO:0001578|GO:0007049|GO:0030308|GO:0031116|GO:0043193|GO:0008017	NM_001032290.1	Homo sapiens proline/serine-rich coiled-coil 1 (PSRC1), transcript variant 4, mRNA.
1510181	0.0112357	1.53746	up	0.0107829	0.631331	-0.0234702	-0.00755978	PTGES	9536	GO:0005624|GO:0005641|GO:0005737|GO:0005792|GO:0016020|GO:0016021|GO:0006693|GO:0007165|GO:0016853|GO:0050220	NM_004878.3	Homo sapiens prostaglandin E synthase (PTGES), mRNA.
5390095	0.0473097	1.68802	down	1.11648	0.361148	-0.244846	-0.402326	RASSF2	9770	GO:0005634|GO:0007165|GO:0007165|GO:0045786|GO:0005515	NM_170773.1	Homo sapiens Ras association (RalGDS/AF-6) domain family 2 (RASSF2), transcript variant 2, mRNA.
1980059	0.0269289	1.58455	down	0.670236	0.00616582	0.0392429	-0.164976	RASSF2	9770	GO:0005634|GO:0007165|GO:0007165|GO:0045786|GO:0005515	NM_170774.1	Homo sapiens Ras association (RalGDS/AF-6) domain family member 2 (RASSF2), transcript variant 2, mRNA.
4490221	0.0210232	1.86827	up	-0.952015	-0.0503143	0.0753722	0.421494	RELN	5649	GO:0005615|GO:0005737|GO:0005576|GO:0005578|GO:0005615|GO:0005737|GO:0000904|GO:0001764|GO:0007411|GO:0007420|GO:0010001|GO:0018108|GO:0021511|GO:0045860|GO:0048265|GO:0051057|GO:0000904|GO:0001764|GO:0007155|GO:0007275|GO:0007411|GO:0007420|GO:0010001|GO:0018108|GO:0021511|GO:0045860|GO:0048265|GO:0051057|GO:0004252|GO:0005509|GO:0005515|GO:0008233|GO:0008270	NM_173054.1	Homo sapiens reelin (RELN), transcript variant 2, mRNA.
60291	0.0188672	1.55818	up	-0.434579	0.205279	-0.0800875	0.181304	RGMB	285704	GO:0005793|GO:0005793|GO:0005886|GO:0046658|GO:0046658|GO:0007155|GO:0007155|GO:0007165|GO:0030509|GO:0030509|GO:0045941|GO:0042802|GO:0042802	NM_173670.2	Homo sapiens RGM domain family, member B (RGMB), transcript variant 2, mRNA.
3400019	0.0425589	1.8433	up	-0.203059	0.679233	-0.529412	0.119235	RGS2	5997	GO:0007049|GO:0007169|GO:0008277|GO:0009968|GO:0004871|GO:0005096|GO:0005516	NM_002923.1	Homo sapiens regulator of G-protein signalling 2, 24kDa (RGS2), mRNA.
1710142	5.54672e-05	2.24622	up	-0.365637	0.801863	-0.255266	0.227797	RGS4	5999	GO:0000188|GO:0008277|GO:0009968|GO:0004871|GO:0004871|GO:0004871|GO:0005096|GO:0005516	NM_005613.3	Homo sapiens regulator of G-protein signalling 4 (RGS4), mRNA.
4210524	0.00283438	2.01104	up	-0.420515	0.587426	-0.323684	0.273716	RND3	390	GO:0000139|GO:0005622|GO:0005794|GO:0016020|GO:0007155|GO:0007264|GO:0030036|GO:0000166|GO:0003924|GO:0005525	NM_005168.3	Homo sapiens Rho family GTPase 3 (RND3), mRNA.
5420368	0.0300407	1.79143	up	-0.529256	0.311857	0.00467618	0.00630601	ROS1	6098	GO:0016020|GO:0016021|GO:0005624|GO:0005890|GO:0016020|GO:0016021|GO:0006468|GO:0007169|GO:0006468|GO:0007165|GO:0007169|GO:0000166|GO:0004714|GO:0004872|GO:0005524|GO:0016740|GO:0000166|GO:0004714|GO:0004872|GO:0005524|GO:0016740	NM_002944.2	Homo sapiens c-ros oncogene 1 , receptor tyrosine kinase (ROS1), mRNA.
5390220	0.0325925	1.65545	up	0.184135	0.911357	-0.119396	-0.190575	S100A9	6280	GO:0005634|GO:0005730|GO:0005737|GO:0006954|GO:0007267|GO:0030595|GO:0031532|GO:0045113|GO:0004871|GO:0005509|GO:0005515|GO:0005515	NM_002965.2	Homo sapiens S100 calcium binding protein A9 (calgranulin B) (S100A9), mRNA.
2600424	0.0107997	1.59934	up	-0.287797	0.389683	-0.00549348	-0.130042	SAA1	6288	GO:0005576|GO:0005576|GO:0006953|GO:0007204|GO:0007204|GO:0030168|GO:0030593|GO:0045785|GO:0045785|GO:0045785|GO:0048246|GO:0048247|GO:0050708|GO:0050716|GO:0050728|GO:0001664|GO:0005319	NM_000331.3	Homo sapiens serum amyloid A1 (SAA1), transcript variant 1, mRNA.
6220397	0.00308101	1.55074	up	-0.161592	0.471361	-0.124005	0.0440814	SC5DL	6309	GO:0005783|GO:0005789|GO:0016020|GO:0016021|GO:0006629|GO:0016126|GO:0055114|GO:0000248|GO:0005506|GO:0016491|GO:0050046	NM_006918.4	Homo sapiens sterol-C5-desaturase (ERG3 delta-5-desaturase homolog, S. cerevisiae)-like (SC5DL), transcript variant 1, mRNA.
5260343	0.00921509	2.97105	down	0.463133	-1.10784	1.09742	-0.328586	SCG5	6447	GO:0005576|GO:0030141|GO:0006810|GO:0006886|GO:0006886|GO:0007218|GO:0016486|GO:0016486|GO:0046883|GO:0046883|GO:0004857|GO:0004857|GO:0005525|GO:0051082	NM_003020.1	Homo sapiens secretogranin V (7B2 protein) (SCG5), mRNA.
6900114	0.0272367	1.70629	up	-0.176509	0.594356	-0.231639	0.0698465	SEMA3A	10371	GO:0005576|GO:0016020|GO:0007275|GO:0007399|GO:0030154|GO:0004872	NM_006080.2	Homo sapiens sema domain, immunoglobulin domain (Ig), short basic domain, secreted, (semaphorin) 3A (SEMA3A), mRNA.
160368	0.00171622	1.71228	down	0.952403	0.17648	-0.0781438	-0.254997	SEMA6B	10501	GO:0016020|GO:0016021|GO:0016020|GO:0016021|GO:0007275|GO:0007399|GO:0030154|GO:0007275|GO:0004872|GO:0004872	NM_032108.2	Homo sapiens sema domain, transmembrane domain (TM), and cytoplasmic domain, (semaphorin) 6B (SEMA6B), mRNA.
6350209	0.00368859	2.35648	up	-0.10392	1.13271	-0.0869525	0.142814	SERPINB2	5055	GO:0005576|GO:0005737|GO:0006916|GO:0004252|GO:0004867	NM_002575.1	Homo sapiens serpin peptidase inhibitor, clade B (ovalbumin), member 2 (SERPINB2), mRNA.
5810095	0.0340301	2.1067	up	-0.270185	0.804803	-0.157184	0.108056	SERPINB2	5055	GO:0005576|GO:0005737|GO:0006916|GO:0004252|GO:0004867	NM_002575.1	Homo sapiens serpin peptidase inhibitor, clade B (ovalbumin), member 2 (SERPINB2), mRNA.
4390450	0.0278872	1.99566	up	-0.439095	0.557774	-0.317495	0.190938	SGK	6446		NM_005627.2	Homo sapiens serum/glucocorticoid regulated kinase (SGK), mRNA.
2340441	0.00320666	1.60688	up	-0.418306	0.265953	-0.241523	0.131751	SLC22A18AS	5003	GO:0005575|GO:0008150|GO:0003674	NM_007105.1	Homo sapiens solute carrier family 22 (organic cation transporter), member 18 antisense (SLC22A18AS), mRNA.
2140707	0.0266265	1.52437	up	-0.0259778	0.582236	-0.276667	0.0812016	SLPI	6590	GO:0005576|GO:0004867	NM_003064.2	Homo sapiens secretory leukocyte peptidase inhibitor (SLPI), mRNA.
3420373	0.00156389	1.75592	up	-0.509474	0.302751	-0.041781	0.043817	SOD2	6648	GO:0005739|GO:0005743|GO:0005759|GO:0005739|GO:0005743|GO:0000303|GO:0001315|GO:0001836|GO:0006302|GO:0006357|GO:0006801|GO:0006979|GO:0042542|GO:0043066|GO:0055114|GO:0000303|GO:0001315|GO:0001836|GO:0006302|GO:0006357|GO:0006801|GO:0006979|GO:0042542|GO:0043066|GO:0055114|GO:0004784|GO:0016491|GO:0030145|GO:0046872|GO:0004784|GO:0016491|GO:0046872	NM_001024466.1	Homo sapiens superoxide dismutase 2, mitochondrial (SOD2), nuclear gene encoding mitochondrial protein, transcript variant 3, mRNA.
3890326	0.0175997	2.01183	up	-0.576196	0.432314	-0.179862	0.0966082	SOD2	6648	GO:0005739|GO:0005743|GO:0005759|GO:0005739|GO:0005743|GO:0000303|GO:0001315|GO:0001836|GO:0006302|GO:0006357|GO:0006801|GO:0006979|GO:0042542|GO:0043066|GO:0055114|GO:0000303|GO:0001315|GO:0001836|GO:0006302|GO:0006357|GO:0006801|GO:0006979|GO:0042542|GO:0043066|GO:0055114|GO:0004784|GO:0016491|GO:0030145|GO:0046872|GO:0004784|GO:0016491|GO:0046872	NM_001024465.1	Homo sapiens superoxide dismutase 2, mitochondrial (SOD2), nuclear gene encoding mitochondrial protein, transcript variant 2, mRNA.
5910349	0.0333043	1.55034	down	0.151516	-0.481072	0.0405404	-0.0308708	SPC24	147841	GO:0000777|GO:0005634|GO:0007049|GO:0007067|GO:0051301|GO:0005515	NM_182513.1	Homo sapiens SPC24, NDC80 kinetochore complex component, homolog (S. cerevisiae) (SPC24), mRNA.
2470689	0.0348559	1.66534	up	-0.249042	0.486778	-0.155562	0.0662686	SPHK1	8877	GO:0005624|GO:0005625|GO:0005737|GO:0005829|GO:0006670|GO:0006916|GO:0007186|GO:0007205|GO:0007242|GO:0019722|GO:0030307|GO:0030335|GO:0045766|GO:0045931|GO:0045987|GO:0046521|GO:0048146|GO:0007205|GO:0007205|GO:0000166|GO:0000287|GO:0003677|GO:0004143|GO:0005516|GO:0005524|GO:0008481|GO:0008481|GO:0016740|GO:0017050|GO:0000287|GO:0004143|GO:0005515|GO:0017050|GO:0000287|GO:0004143|GO:0017050	NM_021972.2	Homo sapiens sphingosine kinase 1 (SPHK1), transcript variant 1, mRNA.
730576	0.000895905	1.76567	up	-0.150166	0.670046	-0.253332	0.047829	SPRY4	81848	GO:0005737|GO:0005886|GO:0042995|GO:0016020|GO:0007275|GO:0009966|GO:0043407|GO:0007275|GO:0009966|GO:0043407|GO:0005515|GO:0005515	NM_030964.2	Homo sapiens sprouty homolog 4 (Drosophila) (SPRY4), mRNA.
6770392	0.00126265	1.54321	down	0.476692	-0.149242	0.161357	-0.190342	SRI	6717	GO:0005622|GO:0005886|GO:0030018|GO:0031982|GO:0005737|GO:0006816|GO:0001508|GO:0006810|GO:0006880|GO:0006942|GO:0007165|GO:0007507|GO:0007517|GO:0008016|GO:0005509|GO:0005515|GO:0005102|GO:0005246|GO:0005509	NM_003130.2	Homo sapiens sorcin (SRI), transcript variant 1, mRNA.
5890100	0.0312807	1.58559	up	0.100993	0.766016	-0.186042	-0.0628837	STX19	415117	GO:0016020|GO:0006886|GO:0016192|GO:0005484	NM_001001850.1	Homo sapiens syntaxin 19 (STX19), mRNA.
6180554	0.0226525	1.53631	up	-0.152562	0.466906	-0.0510936	0.124161	SVEP1	79987	GO:0005576|GO:0005737|GO:0016020|GO:0007155|GO:0003682|GO:0005509|GO:0005515	NM_153366.2	Homo sapiens sushi, von Willebrand factor type A, EGF and pentraxin domain containing 1 (SVEP1), mRNA.
2100274	0.036095	1.60954	up	0.0528782	0.739522	-0.0264465	-0.202194	SYTL2	54843	GO:0005624|GO:0012505|GO:0016020|GO:0019897|GO:0042470|GO:0006886|GO:0016192|GO:0017137|GO:0042043	NM_206928.1	Homo sapiens synaptotagmin-like 2 (SYTL2), transcript variant d, mRNA.
6760037	0.0245625	1.67545	up	0.143033	0.887585	-0.123974	-0.19131	SYTL2	54843	GO:0005624|GO:0012505|GO:0016020|GO:0019897|GO:0042470|GO:0006886|GO:0016192|GO:0017137|GO:0042043	NM_206929.1	Homo sapiens synaptotagmin-like 2 (SYTL2), transcript variant e, mRNA.
5080543	0.00706457	1.87716	up	-0.396322	0.512232	-0.130329	0.157231	TFPI2	7980	GO:0005576|GO:0005578|GO:0007596|GO:0004867|GO:0005201	NM_006528.2	Homo sapiens tissue factor pathway inhibitor 2 (TFPI2), mRNA.
3800706	0.0330325	1.87624	up	-0.210255	0.697587	-0.919149	0.143584	TM4SF19	116211	GO:0016020|GO:0016021	NM_138461.2	Homo sapiens transmembrane 4 L six family member 19 (TM4SF19), mRNA.
3450598	0.0129646	1.65556	up	-0.263132	0.464186	-0.666634	0.186511	TM4SF19	116211	GO:0016020|GO:0016021	XM_001134247.1	PREDICTED: Homo sapiens transmembrane 4 L six family member 19, transcript variant 2 (TM4SF19), mRNA.
4780647	0.0345441	1.52779	up	-0.311711	0.299739	-0.101269	0.120087	TMEM150	129303	GO:0005886|GO:0016021	NM_001031738.1	Homo sapiens transmembrane protein 150 (TMEM150), transcript variant 1, mRNA.
1470669	0.0244526	1.62583	up	-0.377697	0.323482	-0.114155	0.0914984	TNC	3371	GO:0005576|GO:0005578|GO:0005634|GO:0005737|GO:0005886|GO:0005925|GO:0007165|GO:0007155|GO:0007165|GO:0009611|GO:0005102|GO:0005102	NM_002160.2	Homo sapiens tenascin C (TNC), mRNA.
7160612	0.0042786	1.54621	up	-0.485894	0.142844	-0.18693	0.126687	USP36	57602	GO:0005634|GO:0006511|GO:0006511|GO:0004221|GO:0008233|GO:0008234|GO:0004221	NM_025090.2	Homo sapiens ubiquitin specific peptidase 36 (USP36), mRNA.
360379	0.0455359	1.94361	up	-0.223933	0.734808	-0.13455	0.100833	VIP	7432	GO:0005576|GO:0005576|GO:0007186|GO:0007589|GO:0008284|GO:0005184|GO:0005179	NM_194435.1	Homo sapiens vasoactive intestinal peptide (VIP), transcript variant 2, mRNA.
6250091	0.0140093	1.50863	up	-0.485679	0.107564	0.0138113	0.0533503	ZHX2	22882	GO:0005622|GO:0005634|GO:0006402|GO:0045892|GO:0003700|GO:0005515|GO:0008270|GO:0043565|GO:0046872	NM_014943.3	Homo sapiens zinc fingers and homeoboxes 2 (ZHX2), mRNA.
6380379	0.0127326	1.60804	up	0.172168	0.857469	-0.327234	-0.2952	ZNF703	80139	GO:0005622|GO:0005634|GO:0006350|GO:0006355|GO:0008270|GO:0046872	XM_001129663.1	PREDICTED: Homo sapiens zinc finger protein 703 (ZNF703), mRNA.
6550386	0.0232211	1.56223	up	-0.168755	0.474855	-0.00439644	-0.0962213				AV762101	AV762101 MDS Homo sapiens cDNA clone MDSEOA03 5, mRNA sequence
1240333	0.0235452	1.63215	down	0.666705	-0.0400651	0.00729561	-0.128178				AK124299	Homo sapiens cDNA FLJ42306 fis, clone TRACH2001646
1230164	0.0481795	1.6913	up	0.260568	1.0187	-0.0777912	-0.182509				CR612552	full-length cDNA clone XCL0BB001ZD04 of Neuroblastoma of Homo sapiens (human)
2350528	0.00565523	2.02618	up	0.00522391	1.02399	-0.26548	-0.0177458				DA728582	DA728582 NT2RM2 Homo sapiens cDNA clone NT2RM2002174 5, mRNA sequence
1030274	0.0262083	1.54807	up	-0.16005	0.470419	-0.351227	0.0172437				AW956608	EST368678 MAGE resequences, MAGD Homo sapiens cDNA, mRNA sequence
