# Supplementary material for: Caffeic Acid Phenethyl Ester Causes p21Cip1 Induction, Akt Signaling Reduction, and Growth Inhibition in PC-3 Human Prostate Cancer Cells
Source: PLoS One. 2012 Feb 7;7(2):e31286. doi: 10.1371/journal.pone.0031286 (PMC3274546; doi:10.1371/journal.pone.0031286)
Supplement: Table S3 — List of differentially expressed genes commonly appeared at 24 h and 72 h post CAPE treatment. Expression of genes commonly changed at both 24 h and 72 h post CAPE treatment was shown. (XLS) [file pone.0031286.s006.xls]

## Sheet: 24h-72h-common
Supplemental Table 3. List of differentially expressed genes commonly appeared at 24h and 72h post CAPE treatment.
ProbeID	p-value ( 24h )	Fold change (24h)	regulation	p-value ( 72h )	Fold change (72h)	regulation	Symbol	Entrez_Gene_ID	Definition
70167	0.022363	3.04913	up	0.00691903	1.66501	up	LY96	23643	Homo sapiens lymphocyte antigen 96 (LY96), mRNA.
3940673	0.0180762	2.80128	up	0.0204285	1.97135	up	LOC728285	728285	PREDICTED: Homo sapiens similar to keratin associated protein 2-4 (LOC728285), mRNA.
3800706	0.0330325	1.87624	up	0.00103281	2.08888	up	TM4SF19	116211	Homo sapiens transmembrane 4 L six family member 19 (TM4SF19), mRNA.
3400019	0.0425589	1.8433	up	0.0183531	1.5677	up	RGS2	5997	Homo sapiens regulator of G-protein signalling 2, 24kDa (RGS2), mRNA.
1050168	0.0287254	4.26644	up	0.00646194	1.56375	up	PI3	5266	Homo sapiens peptidase inhibitor 3, skin-derived (SKALP) (PI3), mRNA.
5340129	0.00549065	1.96124	up	0.00576275	2.25054	up	AKR1C2	1646	Homo sapiens aldo-keto reductase family 1, member C2 (dihydrodiol dehydrogenase 2; bile acid binding protein; 3-alpha hydroxysteroid dehydrogenase, type III) (AKR1C2), transcript variant 1, mRNA. XM_943424 XM_943425 XM_943427
5090671	0.00704268	3.79898	up	0.0216897	2.27303	up	GDF15	9518	Homo sapiens growth differentiation factor 15 (GDF15), mRNA.
290730	0.0192517	2.16461	up	0.0333211	1.56657	up	HIST1H2BD	3017	Homo sapiens histone cluster 1, H2bd (HIST1H2BD), transcript variant 2, mRNA.
4220246	0.000357605	1.75658	up	0.033041	1.55941	up	CCL20	6364	Homo sapiens chemokine (C-C motif) ligand 20 (CCL20), mRNA.
380010	0.00568788	3.71665	up	0.00436849	1.94183	up	CXCL5	6374	Homo sapiens chemokine (C-X-C motif) ligand 5 (CXCL5), mRNA.
4210524	0.00283438	2.01104	up	0.00665688	1.51299	up	RND3	390	Homo sapiens Rho family GTPase 3 (RND3), mRNA.
3710168	0.0310033	3.85061	up	0.0189939	1.78358	up	KRT34	3885	Homo sapiens keratin 34 (KRT34), mRNA.
2120053	0.023022	2.73982	down	0.0273685	4.37845	down	CYP1B1	1545	Homo sapiens cytochrome P450, family 1, subfamily B, polypeptide 1 (CYP1B1), mRNA.
5260343	0.00921509	2.97105	down	0.000769341	2.68701	down	SCG5	6447	Homo sapiens secretogranin V (7B2 protein) (SCG5), mRNA.
1820592	0.0409641	5.27444	up	0.016911	1.50114	up	HIST2H2AA3	8337	Homo sapiens histone cluster 2, H2aa3 (HIST2H2AA3), mRNA.
3120598	0.0137411	1.81589	up	0.00248697	2.18645	up	AKR1C4	1109	Homo sapiens aldo-keto reductase family 1, member C4 (chlordecone reductase; 3-alpha hydroxysteroid dehydrogenase, type I; dihydrodiol dehydrogenase 4) (AKR1C4), mRNA.
2650035	0.00390656	5.76658	down	0.00223595	2.57824	down	PADI4	23569	Homo sapiens peptidyl arginine deiminase, type IV (PADI4), mRNA.
2810059	0.0159989	1.77564	up	0.019859	1.71192	up	KLF4	9314	Homo sapiens Kruppel-like factor 4 (gut) (KLF4), mRNA.
3450598	0.0129646	1.65556	up	0.0022456	1.80643	up	TM4SF19	116211	PREDICTED: Homo sapiens transmembrane 4 L six family member 19, transcript variant 2 (TM4SF19), mRNA.
5390161	0.039432	1.58206	up	0.0112308	2.07815	up	DUSP5	1847	Homo sapiens dual specificity phosphatase 5 (DUSP5), mRNA.
4290037	0.00569616	2.10857	up	0.0284945	1.50726	up	NOV	4856	Homo sapiens nephroblastoma overexpressed gene (NOV), mRNA.
4150369	0.0351698	1.66945	up	0.0055064	1.57071	up	GK	2710	Homo sapiens glycerol kinase (GK), transcript variant 1, mRNA.
4230201	0.0355497	1.85298	up	0.000162449	1.7535	up	CDKN1A	1026	Homo sapiens cyclin-dependent kinase inhibitor 1A (p21, Cip1) (CDKN1A), transcript variant 1, mRNA.
4670390	0.0328157	3.35623	up	0.00278509	2.14122	up	CXCL2	2920	Homo sapiens chemokine (C-X-C motif) ligand 2 (CXCL2), mRNA.
6860377	0.0292823	1.83384	up	0.00228054	1.69384	up	DUSP1	1843	Homo sapiens dual specificity phosphatase 1 (DUSP1), mRNA.
2970019	0.0116439	3.66631	up	0.0127642	1.62569	up	HIST1H4H	8365	Homo sapiens histone cluster 1, H4h (HIST1H4H), mRNA.
