# Supplementary material for: Caffeic Acid Phenethyl Ester Causes p21Cip1 Induction, Akt Signaling Reduction, and Growth Inhibition in PC-3 Human Prostate Cancer Cells
Source: PLoS One. 2012 Feb 7;7(2):e31286. doi: 10.1371/journal.pone.0031286 (PMC3274546; doi:10.1371/journal.pone.0031286)
Supplement: Table S4 — IPA gene function ontology analysis of genes whose expression are significantly changed by CAPE treatment. IPA gene function ontology analysis was shown of genes whose expression are significantly changed by CAPE treatment for 24 h and 72 h. (XLS) [file pone.0031286.s007.xls]

## Sheet: Sheet1
Supplemental Table 4. IPA gene function ontology analysis of genes whose expression are significantly changed by CAPE treatment.
ProbeID	Symbol	Entrez Gene ID	Accession	72 h fold change	24 h fold change	Function
7210632	AKR1C3	8644	NM_003739.4	1.44398	1.70675	cell proliferation
2360551	ALDH1A3	220	NM_000693.2	0.686731	0.661279	cell death
5810612	ANPEP	290	NM_001150.1	0.652112	0.920189	cell death
6560494	ARTN	9048	NM_057091.1	0.586732	0.991091	cell proliferation, cell survival
5960181	ASNS	440	NM_133436.1	1.15311	1.5658	cell death
1510296	ASNS	440	NM_133436.1	1.01256	1.79352	cell death
4780128	ATF3	467	NM_001040619.1	1.86384	1.48152	cell growth, cell death
2640735	BHLHB2	8553	NM_003670.1	0.887687	1.53531	cell death, cell survival
620360	CAV2	858	NM_001233.3	0.661422	0.68201	cell proliferation
1230047	CBS	875	NM_000071.1	1.25292	1.6648	cell death
4220246	CCL20	6364	NM_004591.1	1.75658	1.55941	cell proliferation
5090347	CD24	100133941	NM_013230.2	1.61336	1.04581	cell proliferation, cell growth, cell death
4230201	CDKN1A	1026	NM_000389.2	1.85298	1.7535	cell proliferation, cell growth, cell death, cell survival
2750196	CSF2	1437	NM_000758.2	1.68197	1.47606	cell proliferation, cell growth, cell death, cell survival
60138	CTH	1491	NM_153742.3	1.2207	1.78376	cell death
1430477	CTSL2	1515	NM_001333.2	0.609955	0.869842	cell proliferation, cell growth, cell death
4670390	CXCL2	2920	NM_002089.3	3.35623	2.14122	cell proliferation, cell growth, cell death
2120053	CYP1B1	1545	NM_000104.2	0.364987	0.228391	cell proliferation, cell death
830619	DDIT3	1649	NM_004083.4	1.86395	1.42778	cell growth, cell death, cell survival
3190148	DDIT4	54541	NM_019058.2	0.650297	2.27433	cell death
6770041	DEFB103B	414325	NM_001081551.2	3.31635	1.11317	cell survival
6900707	DEFB103B	414325	NM_001081551.2	3.30791	1.20108	cell survival
2120091	DEFB4	1673	NM_004942.2	4.27352	0.941041	cell death, cell survival
4880609	DKK1	22943	NM_012242.2	1.8185	1.08279	cell proliferation, cell growth, cell death
5570102	DKK1	22943	NM_012242.2	1.69826	0.951178	cell proliferation, cell growth, cell death
6860377	DUSP1	1843	NM_004417.2	1.83384	1.69384	cell proliferation, cell growth, cell death, cell survival
3780707	DUSP10	11221	NM_144729.1	1.86784	1.37749	cell proliferation, cell death, cell survival
5390161	DUSP5	1847	NM_004419.3	1.58206	2.07815	cell growth, cell survival
6280242	DUT	1854	NM_001025248.1	0.572676	0.866584	cell death
6330494	DUT	1854	NM_001025249.1	0.558266	0.809852	cell death
7150563	ENC1	8507	NM_003633.1	1.84941	1.17979	cell growth
7100639	ERRFI1	54206	NM_018948.2	1.03734	1.7605	cell growth
3420605	ESM1	11082	NM_007036.3	2.03516	1.27642	cell proliferation
580739	FBLN1	2192	NM_001996.2	0.651602	0.818209	cell death
1260068	FST	10468	NM_006350.2	1.46325	1.788	cell proliferation, cell growth, cell death
6020286	FST	10468	NM_013409.1	1.435	1.92785	cell proliferation, cell growth, cell death
670255	GADD45A	1647	NM_001924.2	1.67505	1.2745	cell proliferation, cell growth, cell death, cell survival
4880673	GADD45A	1647	NM_001924.2	1.50829	1.28742	cell proliferation, cell growth, cell death, cell survival
5090671	GDF15	9518	NM_004864.1	3.79898	2.27303	cell proliferation, cell growth, cell death, cell survival
6940017	GJA1	2697	NM_000165.3	1.33091	1.5248	cell proliferation, cell growth, cell death
6220746	GLIPR1	11010	NM_006851.2	1.79482	1.46884	cell death
6660601	HMOX1	3162	NM_002133.1	1.42215	2.24866	cell proliferation, cell growth, cell death, cell survival
4250364	HPGD	3248	NM_000860.3	1.94152	1.2232	cell proliferation, cell growth
1660296	ID2	3398	NM_002166.4	1.95663	1.28163	cell proliferation, cell growth, cell death, cell survival
7570324	ID3	3399	NM_002167.2	1.98424	0.931256	cell proliferation, cell growth, cell death
3870594	IFI16	3428	NM_005531.1	1.50186	1.27656	cell proliferation, cell growth, cell death
840114	IL11	3589	NM_000641.2	2.11582	1.57394	cell proliferation, cell growth, cell death, cell survival
5420386	IL13RA2	3598	NM_000640.2	1.32611	1.57457	cell proliferation, cell growth
6510026	IL23A	51561	NM_016584.2	1.9348	1.21044	cell proliferation, cell growth
4290201	IL24	11009	NM_006850.2	1.78539	0.786169	cell proliferation, cell growth, cell survival
4040576	IL6	3569	NM_000600.1	2.85129	1.48007	cell proliferation, cell growth, cell death, cell survival
1570553	IL8	3576	NM_000584.2	1.48976	1.67093	cell proliferation, cell growth, cell death, cell survival
2810059	KLF4	9314	NM_004235.3	1.77564	1.71192	cell proliferation, cell growth, cell death
4040097	KLF6	1316	NM_001300.4	1.46314	1.59576	cell proliferation, cell death
360110	KLF6	1316	NM_001008490.1	1.40945	1.58407	cell proliferation, cell death
70167	LY96	23643	NM_015364.2	3.04913	1.66501	cell proliferation
150180	MMP10	4319	NM_002425.1	1.62726	0.989308	cell death
2230379	NAMPT	10135	NM_005746.2	1.69758	1.49708	cell proliferation, cell death
4290037	NOV	4856	NM_002514.2	2.10857	1.50726	cell proliferation, cell growth
7570358	NPC1	4864	NM_000271.3	1.27553	1.62844	cell death
4260253	OBFC2A	64859	NM_001031716.1	1.52893	1.00963	cell death
2650035	PADI4	23569	NM_012387.1	0.173413	0.387862	cell growth, cell death
770468	PJCG6	645642	NM_001040066.1	1.56903	1.10253	cell death
240400	PMEPA1	56937	NM_199169.1	0.805275	0.660497	cell growth, cell death
1340600	PPP1R15A	23645	NM_014330.2	1.50388	1.1189	cell growth, cell death
1070762	PSRC1	84722	NM_001032290.1	0.649301	0.941046	cell death
1510181	PTGES	9536	NM_004878.3	1.53746	1.01109	cell proliferation
1980059	RASSF2	9770	NM_170774.1	0.631095	0.868009	cell death
5390095	RASSF2	9770	NM_170773.1	0.592409	0.89659	cell death
3400019	RGS2	5997	NM_002923.1	1.8433	1.5677	cell proliferation
1710142	RGS4	5999	NM_005613.3	2.24622	1.39771	cell proliferation, cell growth, cell death
4210524	RND3	390	NM_005168.3	2.01104	1.51299	cell death
5420368	ROS1	6098	NM_002944.2	1.79143	1.00113	cell growth
5390220	S100A9	6280	NM_002965.2	1.65545	0.95186	cell proliferation, cell death
1510424	S100P	6286	NM_005980.2	3.74406	2.10168	cell proliferation, cell death, cell survival
2600424	SAA1	6288	NM_000331.3	1.59934	0.917291	cell proliferation, cell death
5260343	SCG5	6447	NM_003020.1	0.336581	0.372161	cell death
6900114	SEMA3A	10371	NM_006080.2	1.70629	1.23241	cell proliferation, cell growth, cell death
6350209	SERPINB2	5055	NM_002575.1	2.35648	1.17265	cell proliferation, cell death, cell survival
5810095	SERPINB2	5055	NM_002575.1	2.1067	1.20184	cell proliferation, cell death, cell survival
1440270	SERPIND1	3053	NM_000185.3	1.42562	1.50349	cell proliferation
4390450	SGK	6446	NM_005627.2	1.99566	1.4225	cell death, cell survival
2750128	SLC7A11	23657	NM_014331.3	1.01215	1.77826	cell proliferation, cell growth, cell death
2140707	SLPI	6590	NM_003064.2	1.52437	1.28153	cell proliferation, cell death
3890326	SOD2	6648	NM_001024465.1	2.01183	1.21123	cell proliferation, cell growth, cell death, cell survival
3420373	SOD2	6648	NM_001024466.1	1.75592	1.06113	cell proliferation, cell growth, cell death, cell survival
2470689	SPHK1	8877	NM_021972.2	1.66534	1.16621	cell proliferation, cell growth, cell death, cell survival
730576	SPRY4	81848	NM_030964.2	1.76567	1.23214	cell proliferation
1570646	TFAP2A	7020	NM_001042425.1	1.01579	0.628143	cell growth, cell death
5080543	TFPI2	7980	NM_006528.2	1.87716	1.22057	cell proliferation, cell death
5810685	THBS1	7057	NM_003246.2	0.851738	0.497191	cell proliferation, cell growth, cell death
1470669	TNC	3371	NM_002160.2	1.62583	1.15321	cell proliferation, cell death
3990619	TOP2A	7153	NM_001067.2	0.676593	0.660714	cell death, cell survival
1990630	TRIB3	57761	NM_021158.3	0.999047	1.71158	cell death
4490577	TUBA1A	7846	NM_006009.2	0.832633	0.616725	cell death
6580474	TUBB	203068	NM_178014.2	0.855147	0.582589	cell survival
3610259	TUBB	203068	NM_178014.2	0.796023	0.549877	cell survival
360379	VIP	7432	NM_194435.1	1.94361	1.17722	cell proliferation, cell growth, cell death, cell survival
6250091	ZHX2	22882	NM_014943.3	1.50863	1.02779	cell death
